# Association Between Chiropractic Use and Opioid Receipt Among Patients with Spinal Pain: A Systematic Review and Meta-analysis

Kelsey L. Corcoran, DC, <sup>\*,†</sup>, Lori A. Bastian, MD <sup>†,‡</sup>, Craig G. Gunderson, MD <sup>†,‡</sup>, Catherine Steffens <sup>†</sup>, Alexandria Brackett, MA, MLIS<sup>§</sup>, Anthony J. Lisi, DC<sup>\*,†</sup>

\*Center for Medical Informatics, Yale School of Medicine, Yale University, New Haven, Connecticut; <sup>†</sup>Pain Research, Informatics, Multimorbidities, and Education (PRIME) Center, VA Connecticut Healthcare System, West Haven, Connecticut; <sup>‡</sup>Department of Internal Medicine, Yale School of Medicine, Yale University, New Haven, Connecticut; <sup>§</sup>Cushing/Whitney Medical Library, Yale School of Medicine, Yale University, New Haven, Connecticut

Correspondence to: Kelsey L. Corcoran, DC, Yale Center for Medical Informatics, 300 George St., Suite 501, New Haven, CT 06511, USA. Tel: 203-737-6091; Fax: 203-737-5708; E-mail: kelsey.corcoran@yale.edu.

Funding sources: This material is based upon work supported by the Department of Veterans Affairs, Veterans Health Administration, Office of Research and Development, and Health Services Research and Development IIR 12-118, CIN 13-407; by the NCMIC Foundation; and with resources from and the use of facilities at the VA Connecticut Healthcare System.

Disclosures: The views expressed in this manuscript are those of the authors and do not necessarily reflect the position or policy of the Department of Veterans Affairs or the United States Government.

Conflict of interest: The authors have no conflicts of interest to report.

## Abstract

**Objective.** To investigate the current evidence to determine if there is an association between chiropractic use and opioid receipt. **Design.** Systematic review and meta-analysis. **Methods.** The protocol for this review was registered on PROSPERO (CRD42018095128). The MEDLINE, PubMed, EMBASE, AMED, CINAHL, and Web of Science databases were searched for relevant articles from database inception through April 18, 2018. Controlled studies, cohort studies, and case-control studies including adults with noncancer pain were eligible for inclusion. Studies reporting opioid receipt for both subjects who used chiropractic care and nonusers were included. Data extraction and risk of bias assessment were completed independently by pairs of reviewers. Meta-analysis was performed and presented as an odds ratio with 95% confidence interval. **Results.** In all, 874 articles were identified. After detailed selection, 26 articles were reviewed in full, and six met the inclusion criteria. Five studies focused on back pain and one on neck pain. The prevalence of chiropractic care among patients with spinal pain varied between 11.3% and 51.3%. The proportion of patients receiving an opioid prescription was lower for chiropractic users (range = 12.3–57.6%) than nonusers (range = 31.2–65.9%). In a random-effects analysis, chiropractic users had a 64% lower odds of receiving an opioid prescription than nonusers (odds ratio = 0.36, 95% confidence interval = 0.30–0.43,  $P < 0.001$ ,  $I^2 = 92.8\%$ ). **Conclusions.** This review demonstrated an inverse association between chiropractic use and opioid receipt among patients with spinal pain. Further research is warranted to assess this association and the implications it may have for case management strategies to decrease opioid use.

**Key Words:** Chiropractic; Analgesic; Opioid; Low Back Pain; Neck Pain; Systematic Review; Meta-analysis

## Introduction

Since the release of the Centers of Disease Control and Prevention's guidelines for prescribing opioids for chronic pain in 2016, certain opioid prescribing rates have declined [1,2]. This includes the rates of high-dosage prescriptions ( $\geq 90$  morphine equivalent

milligrams per day) and overall opioid prescribing [1]. Although this trend is favorable, preventing opioid addiction and overdose still remain a significant public health priority [3]. In 2017 alone, an average 115 Americans died daily from opioid overdose [4].

Overdose deaths from opioids are correlated with prescribing patterns and legal sales [5–8]. Therefore, one

component of addressing the opioid epidemic is the effective utilization of nonpharmacological therapies as front-line treatment options to avoid the prescription of opioids and the potential harms associated with their use [2]. Current clinical practice guidelines for the management of low back pain (LBP), neck pain, and osteoarthritis of the hip, knee, and hand recommend specific nonpharmacological treatments as initial considerations ahead of pharmacological treatment [9–12].

Chiropractors provide many of the nonpharmacological treatments recommended by clinical practice guidelines for spinal pain, including spinal manipulation, patient education, exercise, acupuncture, and massage [13–15]. Chiropractors do not prescribe opioids; therefore, patients would never receive opioid prescriptions as part of a chiropractic treatment plan. Yet it is unknown whether patients who receive chiropractic care are less likely to receive an opioid prescription from any provider for a given complaint. Recent work from the Veterans Health Administration (VHA) demonstrated that veterans who utilized VHA chiropractic services had a decreased likelihood of receiving an opioid after an initial chiropractic visit than before the visit [16].

This project was a systematic review and meta-analysis to investigate the current evidence and determine if there is an association between chiropractic use and opioid receipt. To date, no review has assessed for such an association.

## Methods

### Search Strategy

Before commencing the review, a protocol was registered on PROSPERO (CRD42018095128). A clinical librarian (AB) developed the literature search strategy using the protocol as a framework. The search strategy used both key words and controlled vocabulary combining the terms for “chiropractic” and “opioids.” The OVID Medline, OVID Embase, OVID AMED, Web of Science, PubMed, and CINAHL databases were searched from database inception to April 18, 2018. The year of inception of the included databases was 1946 for OVID Medline, 1974 for OVID Embase, 1985 for OVID AMED, 1946 for PubMed, and 1937 for CINAHL, and Web of Science’s earliest record was 1900. The OVID Medline search strategy is included in Supplement 1. The search results were exported into EndNote (Clarivate Analytics, Philadelphia, Pennsylvania), deduplicated, and then uploaded to Covidence (Veritas Health Innovation, Melbourne, Australia) for screening. Additional articles were identified by examining included articles’ bibliographies and other sources. Gray literature was considered by searching the Cochrane library, ongoing registered clinical trials, and as part of the main search strategy, as gray literature is included in both OVID Embase and OVID AMED.

### Inclusion Criteria

To be included in this review, studies had to include only adults ( $\geq 18$  years of age) with noncancer pain and

quantitatively report on opioid receipt for both a group of chiropractic users and nonusers. Chiropractic users were defined as individuals who received care from a Doctor of Chiropractic. Controlled studies, cohort studies, and case-control studies were eligible for inclusion.

### Exclusion Criteria

Studies including children ( $< 18$  years of age), cancer pain, and animals were excluded. Studies that evaluated chiropractic care as part of a combined, multidisciplinary approach were excluded unless the chiropractic care portion was assessed separately. Studies that evaluated spinal manipulation delivered by providers other than chiropractors were also excluded, unless the chiropractic care was assessed separately.

### Selecting Manuscripts for Full-Text Review

Two co-authors (KC, AL) used inclusion and exclusion criteria to assess titles and abstracts. Eligibility decisions and disagreements were reconciled through discussion or by a third reviewer (LB). Full-text articles included by two reviewers underwent further evaluation.

### Data Extraction and Quality Assessment

Two co-authors (CS, LB) extracted data from published reports into evidence tables. An additional co-author over-read the evidence tables (KC). In instances where there were questions about the study data of included manuscripts, the corresponding author of the manuscript was contacted. For included studies, data were extracted on study characteristics, study sample, quality, prevalence of chiropractic use and observation period assessed, proportion of opioid receipt for chiropractic users and nonusers, and length of follow-up. If studies reported on more than one follow-up duration for opioid receipt, the longer follow-up period was chosen for data extraction.

Two co-authors (KC, CS) independently rated quality at the study level using key criteria described in the Newcastle-Ottawa Quality Assessment Scale for Cohort Studies and assigned a numerical score out of a possible nine points [17]. The Newcastle Ottawa Scale (NOS) is an evaluation tool for cohort studies has demonstrated content validity and inter-rater reliability [17]. Higher scores on the NOS represent a lower risk of bias, and the NOS uses three main categories to assess risk of bias: selection of the cohort, comparability of the exposed and nonexposed cohort, and assessment of outcomes [18]. Disagreements in NOS scoring were adjudicated by obtaining a third co-author’s (LB) opinion.

### Statistical Analysis

The proportion of patients receiving opioids was calculated for each individual study for the group receiving chiropractic care and compared with the group that was not receiving chiropractic care. The difference in proportions between these groups was expressed as an odds

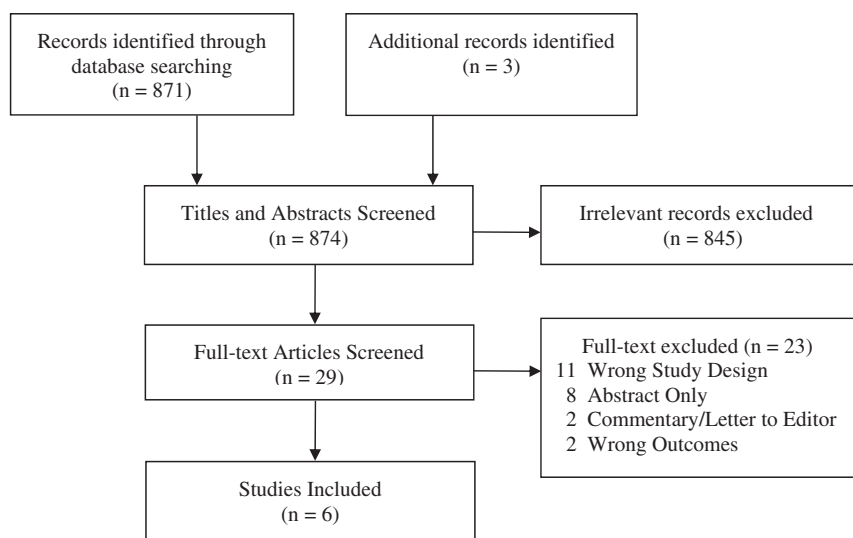

**Figure 1.** Flow diagram of study selection.

ratio. Individual study odds ratios were plotted using a forest plot, and the pooled odds ratio was calculated using random effects meta-analysis. Between-study heterogeneity was estimated using the  $I^2$  statistic [19]. Statistical significance was set at a  $P$  value of  $<0.05$ . Statistical analysis was performed using Stata/MP, version 15.1 (StataCorp, College Station, TX, USA).

## Results

The electronic literature search identified a total of 1,051 records with 871 original articles. Three additional articles were identified by the co-authors. After detailed selection, 26 articles were reviewed in full, and six met study inclusion criteria (Figure 1) [20–25]. During title and abstract screening, the majority of excluded manuscripts were reviews or case reports (53%). Additional manuscripts were excluded at this stage because they did not examine chiropractic care or did not have outcome data on opioid use. Very few studies ( $<5\%$ ) were excluded because they included children or examined cancer pain. Additional data were requested and received by investigators from one of the included studies [23]. The gray literature search yielded no additional literature pertinent to this review.

All included studies were cohort studies with a low risk of bias (Tables 1 and 2). The prevalence of chiropractic care varied between 11.3% and 51.3%. Chiropractic users had a lower percentage of opioid receipt than nonusers in all studies included (Table 3, Figure 2).

All six studies (62,624 patients) provided sufficient data and were judged similar enough to be pooled for meta-analysis. In a random-effects analysis, chiropractic users had a 64% lower odds of receiving an opioid prescription than nonusers (odds ratio = 0.36, 95% confidence interval = 0.30–0.43,  $P < 0.001$ ,  $I^2 = 92.8\%$ ).

## Discussion

The main finding of the review was that all included studies demonstrated a negative association between use of chiropractic care and opioid prescription receipt. The current study adds to the small but increasing body of evidence demonstrating that access to and utilization of chiropractic services are negatively associated with opioid use, and thus may warrant further investigation to determine if chiropractic care may be an effective component of opioid prescription reduction strategies [16,26,27]. It is noteworthy that the negative association found in this review encompasses all providers that patients may have seen for their care, not just the chiropractors, who would never prescribe opioids based on their scope of practice.

Chiropractors predominantly manage spinal conditions, with back conditions being the most common reason to seek chiropractic care [13,28]. All studies included in this review evaluated patient populations with spinal pain, with the majority focusing on back pain and one study addressing neck pain patients. Back pain is also responsible for a considerable amount of worldwide disability and social costs, including an estimated cost of  $> \$100$  billion per year in the United States alone [29,30]. It is logical that the majority of the current literature existing on the topic of chiropractic care and opioid receipt predominantly focuses on back pain.

In four of the six studies included, chiropractors were either the first provider seen or part of the initial treatment strategy. Ideally, nonpharmacological therapies including multimodal chiropractic care are utilized as frontline treatments to ultimately avoid the prescription of opioids, which are associated with poor outcomes for low back pain and chronic pain [7,31]. For patients who are already receiving opioid therapy, the effectiveness of chiropractic care on pain and function is not well understood. All studies included in this review did not assess for prior opioid use; therefore, no conclusions can be

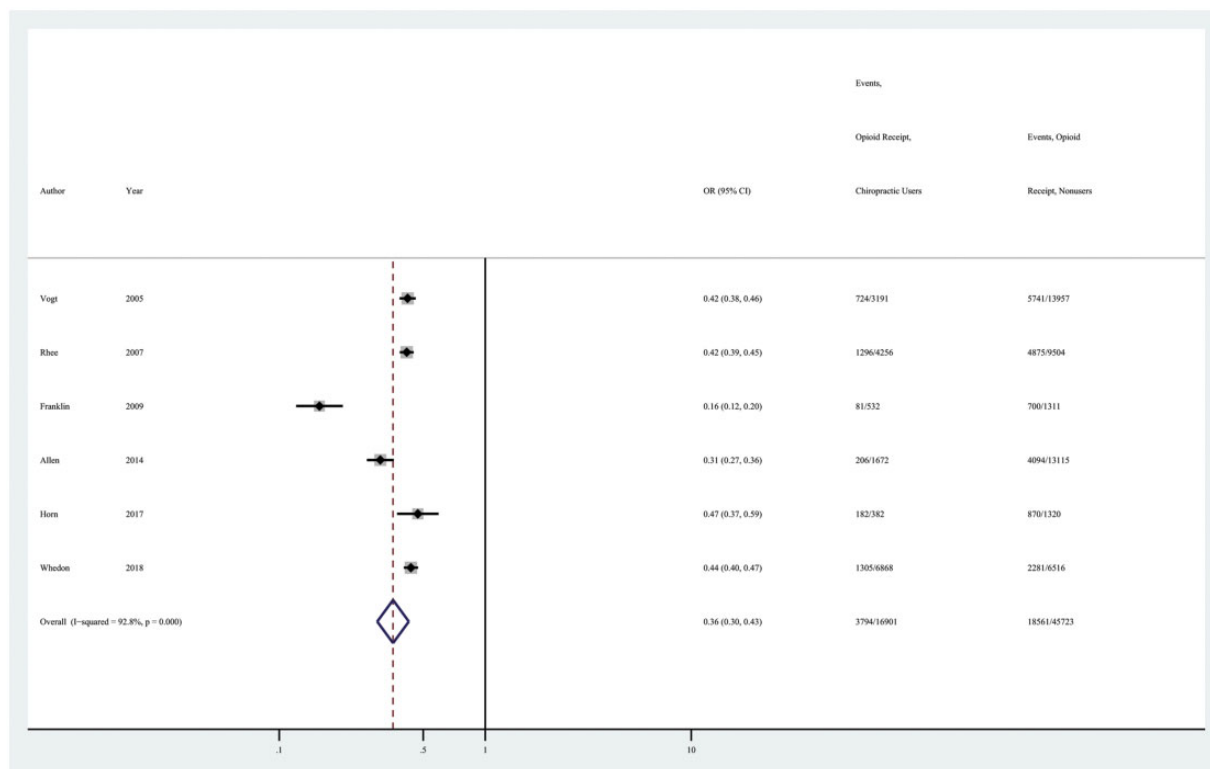

**Figure 2.** Forest plot of the odds ratio of opioid receipt for chiropractic users compared with nonusers. CI = confidence interval; OR = odds ratio.

drawn as to whether an association between chiropractic care and opioid receipt exists in opioid-naïve patient populations and/or populations that have used opioid therapy. A VHA study evaluating the implementation of a stepped-care model of pain management for long-term opioid users demonstrated that referrals to chiropractic services and physical therapy increased, whereas high-dose opioid prescribing was successfully decreased, during a four-year study period [27]. It is possible that chiropractic care may be a reasonable component of a pain management plan during an opioid taper, though this has not been sufficiently studied.

Only one of the included studies graded LBP severity and incorporated severity into a regression model [23]. This study demonstrated that long-term opioid use (one or more years) was significantly lower for those who saw a chiropractor as the first provider for LBP compared with individuals who initially saw other provider types after adjusting for LBP severity, baseline pain, and function [23]. An additional study by Whedon et al. used propensity scoring and determined that the chiropractic users were healthier than the nonusers studied [24]. However, the authors reported that the difference in opioid receipt for chiropractic users and nonusers was minimally affected by propensity score adjustments [24]. These two studies preliminarily suggest that the negative association between chiropractic use and opioid receipt may persist despite potential differences in disease severity and the general health of the individuals utilizing

chiropractic care. However, more research is needed, particularly controlled trials to account for potential selection bias.

None of the included studies identified the specific treatments that patients received from the chiropractors. Therefore, we cannot comment on if specific treatment components of multimodal chiropractic care contributed more than others to the inverse association between chiropractic use and opioid receipt. It is also unknown whether this association is unique to chiropractic care or similar to clinical management from other nonpharmacological health care providers such as physical therapists and acupuncturists. Of the studies included in this review, four reported on the likelihood of opioid receipt for physical therapy patients, and none reported on other traditionally nonpharmacological health care provider types [20–22,25]. The one study on neck pain demonstrated that patients seen by physical therapists also had a decreased odds of opioid receipt [25]. For the included studies of low back pain that referred to physical therapy, the results were mixed. Rhee et al. found that physical therapy users were more likely to receive an opioid prescription than to not receive one, whereas Vogt et al. similarly reported that patients with an opioid claim were more likely to use physical therapy than those without an opioid claim [20,21]. In contrast, Allen et al. demonstrated that patients who were treated by a physical therapist were less likely to receive opioids than to not

**Table 1.** Characteristics of included studies

| Author Year   | Dates Data Collected | No.    | US State     | Age, y* | Sex, % Female | Pain Region | Study Type           | Patient Selection           | Prevalence of Chiropractic Care, % | Observation Period of Chiropractic Use |
|---------------|----------------------|--------|--------------|---------|---------------|-------------|----------------------|-----------------------------|------------------------------------|----------------------------------------|
| Vogt 2005     | 2001                 | 17,148 | PA           | 18–56   | 56.4          | Low back    | Retrospective cohort | Insurance                   | 18.6                               | 1 y                                    |
| Rhee 2007     | 2002–2004            | 13,760 | IL (WA data) | 47      | 60            | Low back    | Retrospective cohort | Medical and pharmacy claims | 31                                 | 7 d                                    |
| Franklin 2009 | 2002–2004            | 1,843  | WA           | 39.4    | 32.4          | Back        | Prospective cohort   | Workers' compensation       | 28.9                               | First provider                         |
| Allen 2014    | 2001–2009            | 14,787 | MA           | 50.7    | 24.1          | Back        | Cohort               | Insurance                   | 11.3                               | 6 wk                                   |
| Horn 2017     | 2012–2013            | 1,702  | UT           | 45.3    | 69.2          | Neck        | Retrospective cohort | Claims data                 | 22.4                               | First provider                         |
| Whedon 2018   | 2013–2014            | 13,384 | NH           | 18–99   | 53.2          | Low back    | Retrospective cohort | Claims data                 | 51.3                               | 1 y                                    |

\* Age presented as mean or range.

receive them during the first four weeks of low back pain [22]. This sampling of the literature is not comprehensive enough to determine the potential association between physical therapy and opioid receipt, but it does demonstrate that for included studies there were instances where the inverse association between chiropractic use and opioid receipt was similar to the relationship between physical therapy and opioid receipt and instances where the relationship between physical therapy and opioid receipt was different. Further research is needed to determine if the inverse association demonstrated in this review between chiropractic care and opioid receipt is unique to chiropractic care or consistent with the relationship between opioid receipt and other nonpharmacological health care specialties.

Further research is warranted given that effective strategies to decrease opioid prescribing are a public health and research priority [3,32,33]. Developing a better understanding of the relationship between chiropractic care and opioid use has the potential to impact clinical decisions and health care policy, especially concerning access to chiropractic services within health care systems and sequencing with other therapies. Although the results of this review are promising, more research is needed to understand which components of multimodal chiropractic care may be inversely associated with opioid use and if this association is unique to chiropractic management or consistent with other nonpharmacological therapies. Future research on the relationship between chiropractic use and opioid receipt should also include randomized controlled trials, as there were none available for inclusion in this review. This could inform how to best operationalize chiropractic services to support improvement in rates of opioid use.

### Limitations

No conclusion of causation can be made from the association presented in this study, nor can it be concluded that the negative association between chiropractic care and opioid receipt is unique to chiropractic care and not consistent with other therapies.

There are several limitations inherent in this study. There was a small quantity of available research that met the inclusion criteria. The included studies had significant heterogeneity of their results. In all but one study, the severity of spinal disease was not reported. Therefore, we cannot comment on whether differences in disease severity existed between chiropractic users and nonusers, which may have influenced the pooled odds ratio of opioid receipt. We also cannot conclude if there were other differences between the chiropractic users and nonusers that may have resulted from the self-selection of chiropractic services in these cohort studies. For instance, patients who chose to undergo chiropractic care may have been inherently opposed to opioid medications, which could explain some of the



**Table 2.** Study quality assessments using the Newcastle-Ottawa Quality Assessment Scale

| Author Year   | Selection | Comparability | Outcome | NOS Score | Comment                                                  |
|---------------|-----------|---------------|---------|-----------|----------------------------------------------------------|
| Vogt 2005     | ***       | **            | ***     | 8/9       | Prior opioid receipt not reported                        |
| Rhee 2007     | ****      | *             | **      | 7/9       | Opioid receipt assessed for 7 d after chiropractic visit |
| Franklin 2009 | ***       | **            | ***     | 8/9       | Prior opioid receipt not reported                        |
| Allen 2014    | ****      | **            | **      | 8/9       | Follow-up at 4 wk                                        |
| Horn 2017     | ***       | **            | ***     | 8/9       | Subjects all from University of Utah Health Plans        |
| Whedon 2018   | ***       | **            | ***     | 8/9       | Medicare and Medicaid claims excluded                    |

\*Asterisk indicates item achieves 1 point on the NOS.  
NOS = Newcastle Ottawa Scale.

**Table 3.** Opioid use of chiropractic users and nonusers

| Study         | Opioid Receipt: Sample, % | Opioid Receipt:       |             | Follow-up Duration |
|---------------|---------------------------|-----------------------|-------------|--------------------|
|               |                           | Chiropractic Users, % | Nonusers, % |                    |
| Vogt 2005     | 37.7                      | 22.7                  | 41.1        | 1 y                |
| Rhee 2007     | 44.8                      | 30.4                  | 51.3        | 7 d                |
| Franklin 2009 | 42.4                      | 15.2                  | 53.4        | 1 y                |
| Allen 2014    | 29.1                      | 12.3                  | 31.2        | 4 wk               |
| Horn 2017     | 61.8                      | 47.6                  | 65.9        | 1 y                |
| Whedon 2018   | 26.8                      | 19                    | 35          | 1 y                |

inverse association we found. Details regarding chiropractic management, such as dose and therapies utilized, were also not reported and may have influenced study results. It is likely that the available research on the topic of chiropractic use and opioid receipt is subject to both publication bias and selective reporting. Although all included studies had a low risk of bias at the study level, the risk of bias for the outcomes reported in this paper was not evaluated. It is likely that there is more bias at the outcome level than at the study level, as none of the included studies accounted for opioid receipt before the study period.

## Conclusions

This systematic review demonstrated an inverse association between chiropractic use and opioid receipt among patients with spinal pain. Overall, chiropractic users had a 64% lower odds of receiving an opioid prescription than nonusers. Further research is warranted to assess this association and the implications it may have for case management strategies to decrease opioid use.

## Acknowledgments

The study authors would like to thank Gary M. Franklin, MD, MPH, and Deborah Fulton-Kehoe, PhD, MPH, from the University of Washington for supplying additional study data and Khadija El-Hazimy and Vermetha Polite of the Cushing/Whitney Medical Library at Yale University for administrative support.

## Supplementary Data

Supplementary data are available at *Pain Medicine* online.

## References

1. Bohnert ASB, Guy GP Jr, Losby JL. Opioid prescribing in the United States before and after the Centers for Disease Control and Prevention's 2016 opioid guideline. *Ann Intern Med* 2018;169(6):367–75.
2. Dowell D, Haegerich TM, Chou R. CDC guideline for prescribing opioids for chronic pain - United States, 2016. *MMWR Recomm Rep* 2016;65(1):1–49.
3. Alexander LM, Keahey D, Dixon K. Opioid use disorder: A public health emergency. *JAAPA* 2018;31(10):47–52.
4. Centers for Disease Control and Prevention. Wide-Ranging Online Data for Epidemiologic Research (WONDER). Atlanta, GA: National Center for Health Statistics; 2017.
5. Bohnert AS, Valenstein M, Bair MJ, et al. Association between opioid prescribing patterns and opioid overdose-related deaths. *JAMA* 2011;305(13):1315–21.
6. Gomes T, Mamdani MM, Dhalla IA, Paterson JM, Juurlink DN. Opioid dose and drug-related mortality in patients with nonmalignant pain. *Arch Intern Med* 2011;171(7):686–91.
7. Dunn KM, Saunders KW, Rutter CM, et al. Opioid prescriptions for chronic pain and overdose: A cohort study. *Ann Intern Med* 2010;152(2):85–92.
8. Centers for Disease Control and Prevention. Vital Signs: Overdoses of Prescription Opioid Pain Relievers—United States, 1999–2008. Atlanta: Centers for Disease Control and Prevention; 2011. Available at: [https://www.cdc.gov/mmwr/preview/mmwrhtml/mm6043a4.htm?s\\_cid=mm6043a4\\_w%20-%20fig2](https://www.cdc.gov/mmwr/preview/mmwrhtml/mm6043a4.htm?s_cid=mm6043a4_w%20-%20fig2). (accessed January 17, 2019).
9. Qaseem A, Wilt TJ, McLean RM, Forcica MA. Noninvasive treatments for acute, subacute, and chronic low back pain: A clinical practice guideline from the American College of Physicians. *Ann Intern Med* 2017;166(7):514–30.

10. Cote P, Wong JJ, Sutton D, et al. Management of neck pain and associated disorders: A clinical practice guideline from the Ontario Protocol for Traffic Injury Management (OPTiMa) Collaboration. *Eur Spine J* 2016;25(7):2000–22.
11. Bruyere O, Cooper C, Pelletier JP, et al. An algorithm recommendation for the management of knee osteoarthritis in Europe and internationally: A report from a task force of the European Society for Clinical and Economic Aspects of Osteoporosis and Osteoarthritis (ESCEO). *Semin Arthritis Rheum* 2014;44(3):253–63.
12. Hochberg MC, Altman RD, April KT, et al. American College of Rheumatology 2012 recommendations for the use of nonpharmacologic and pharmacologic therapies in osteoarthritis of the hand, hip, and knee. *Arthritis Care Res (Hoboken)* 2012;64(4):465–74.
13. Lisi AJ, Brandt CA. Trends in the use and characteristics of chiropractic services in the Department of Veterans Affairs. *J Manipulative Physiol Ther* 2016;39(5):381–6.
14. Mootz RD, Cherkin DC, Odegard CE, Eisenberg DM, Barassi JP, Deyo RA. Characteristics of chiropractic practitioners, patients, and encounters in Massachusetts and Arizona. *J Manipulative Physiol Ther* 2005;28(9):645–53.
15. Coulter ID, Shekelle PG. Chiropractic in North America: A descriptive analysis. *J Manipulative Physiol Ther* 2005;28(2):83–9.
16. Lisi AJ, Corcoran KL, DeRycke EC, et al. Opioid use among veterans of recent wars receiving Veterans Affairs chiropractic care. *Pain Med* 2018;19(Suppl 1):S54–S60.
17. Wells GS, Shea B, O'Connell D, et al. The Newcastle-Ottawa Scale (NOS) for Assessing the Quality of Nonrandomised Studies in Meta-Analyses. Ottawa, Canada: Ottawa Hospital Research Institute; 2013. Available at: [http://www.ohri.ca/programs/clinical\\_epidemiology/oxford.asp](http://www.ohri.ca/programs/clinical_epidemiology/oxford.asp). (accessed January 17, 2019).
18. Baldacchino A, Balfour DJ, Matthews K. Impulsivity and opioid drugs: Differential effects of heroin, methadone and prescribed analgesic medication. *Psychol Med* 2015;45(6):1167–79.
19. Higgins JP, Thompson SG, Deeks JJ, Altman DG. Measuring inconsistency in meta-analyses. *BMJ* 2003;327(7414):557–60.
20. Rhee Y, Taitel MS, Walker DR, Lau DT. Narcotic drug use among patients with lower back pain in employer health plans: A retrospective analysis of risk factors and health care services. *Clin Ther* 2007;29(Suppl):2603–12.
21. Vogt MT, Kwok CK, Cope DK, Osial TA, Culyba M, Starz TW. Analgesic usage for low back pain: Impact on health care costs and service use. *Spine (Phila Pa 1976)* 2005;30(9):1075–81.
22. Allen H, Wright M, Craig T, et al. Tracking low back problems in a major self-insured workforce: Toward improvement in the patient's journey. *J Occup Environ Med* 2014;56(6):604–20.
23. Franklin GM, Rahman EA, Turner JA, Daniell WE, Fulton-Kehoe D. Opioid use for chronic low back pain: A prospective, population-based study among injured workers in Washington State, 2002-2005. *Clin J Pain* 2009;25(9):743–51.
24. Whedon JM, Toler AWJ, Goehl JM, Kazal LA. Association between utilization of chiropractic services for treatment of low-back pain and use of prescription opioids. *J Altern Complement Med* 2018;24(6):552–6.
25. Horn ME, George SZ, Fritz JM. Influence of initial provider on health care utilization in patients seeking care for neck pain. *Mayo Clin Proc Inn Qual Outcomes* 2017;1(3):226–33.
26. Weeks WB, Goertz CM. Cross-sectional analysis of per capita supply of doctors of chiropractic and opioid use in younger Medicare beneficiaries. *J Manipulative Physiol Ther* 2016;39(4):263–6.
27. Dorflinger L, Moore B, Goulet J, et al. A partnered approach to opioid management, guideline concordant care and the stepped care model of pain management. *J Gen Intern Med* 2014;29(Suppl 4):870–6.
28. Adams J, Peng W, Cramer H, et al. The prevalence, patterns, and predictors of chiropractic use among US adults: Results from the 2012 National Health Interview Survey. *Spine (Phila Pa 1976)* 2017;42(23):1810–6.
29. Vos T, Flaxman AD, Naghavi M, et al. Years lived with disability (YLDs) for 1160 sequelae of 289 diseases and injuries 1990-2010: A systematic analysis for the Global Burden of Disease Study 2010. *Lancet* 2012;380(9859):2163–96.
30. Katz JN. Lumbar disc disorders and low-back pain: Socioeconomic factors and consequences. *J Bone Joint Surg Am* 2006;88(Suppl 2):21–4.
31. Ashworth J, Green DJ, Dunn KM, Jordan KP. Opioid use among low back pain patients in primary care: Is opioid prescription associated with disability at 6-month follow-up? *Pain* 2013;154(7):1038–44.
32. Department of Health and Human Services. NIH-DoD-VA Pain Management Collaboratory - Pragmatic Clinical Trials Demonstration Projects (UG3/UH3). Washington, DC: Department of Health and Human Services, Department of Defense, Department of Veterans Affairs; 2016. Available at: <https://grants.nih.gov/grants/guide/rfa-files/RFA-AT-17-001.html>. (accessed January 17, 2019).
33. Kligler B, Bair MJ, Banerjee R, et al. Clinical policy recommendations from the VHA state-of-the-art conference on non-pharmacological approaches to chronic musculoskeletal pain. *J Gen Intern Med* 2018;33(Suppl 1):16–23.
